# Supplementary material for: RNA-Seq Analysis of Mycobacterium avium Non-Coding Transcriptome
Source: PubMed Central journal article supplement (PMC3774663; doi:10.1371/journal.pone.0074209), 2013-09-16
Supplement: pone.0074209.s001.pdf [file pone.0074209.s001.pdf]

igMAV\_1034-1035

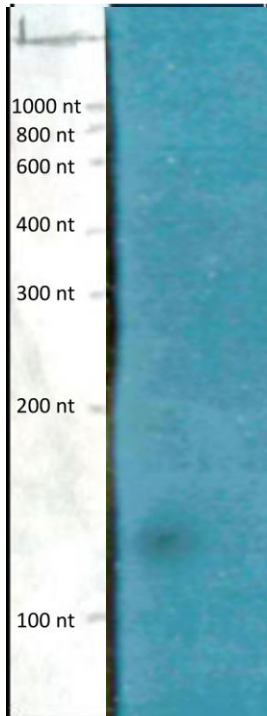

igMAV\_1415-1416

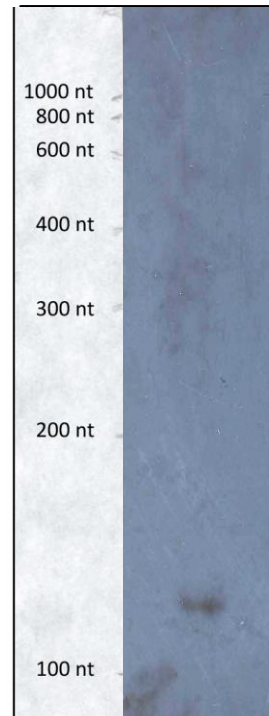

igMAV\_2868-2869

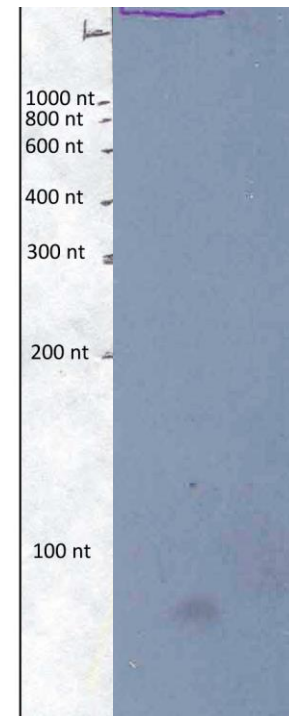

Suppl. figure: Northern blots of intergenic small RNAs igMAV\_1034-1035, igMAV\_1415-1416 and igMAV\_2868-2869. Sizes of the bands of RiboRuler Low Range RNA Ladder (Thermoscientific) are shown.
